# Supplementary material for: ProKinO: An Ontology for Integrative Analysis of Protein Kinases in Cancer
Source: PubMed Central journal article supplement (PMC3237543; doi:10.1371/journal.pone.0028782), 2011-12-14

# Figure S7

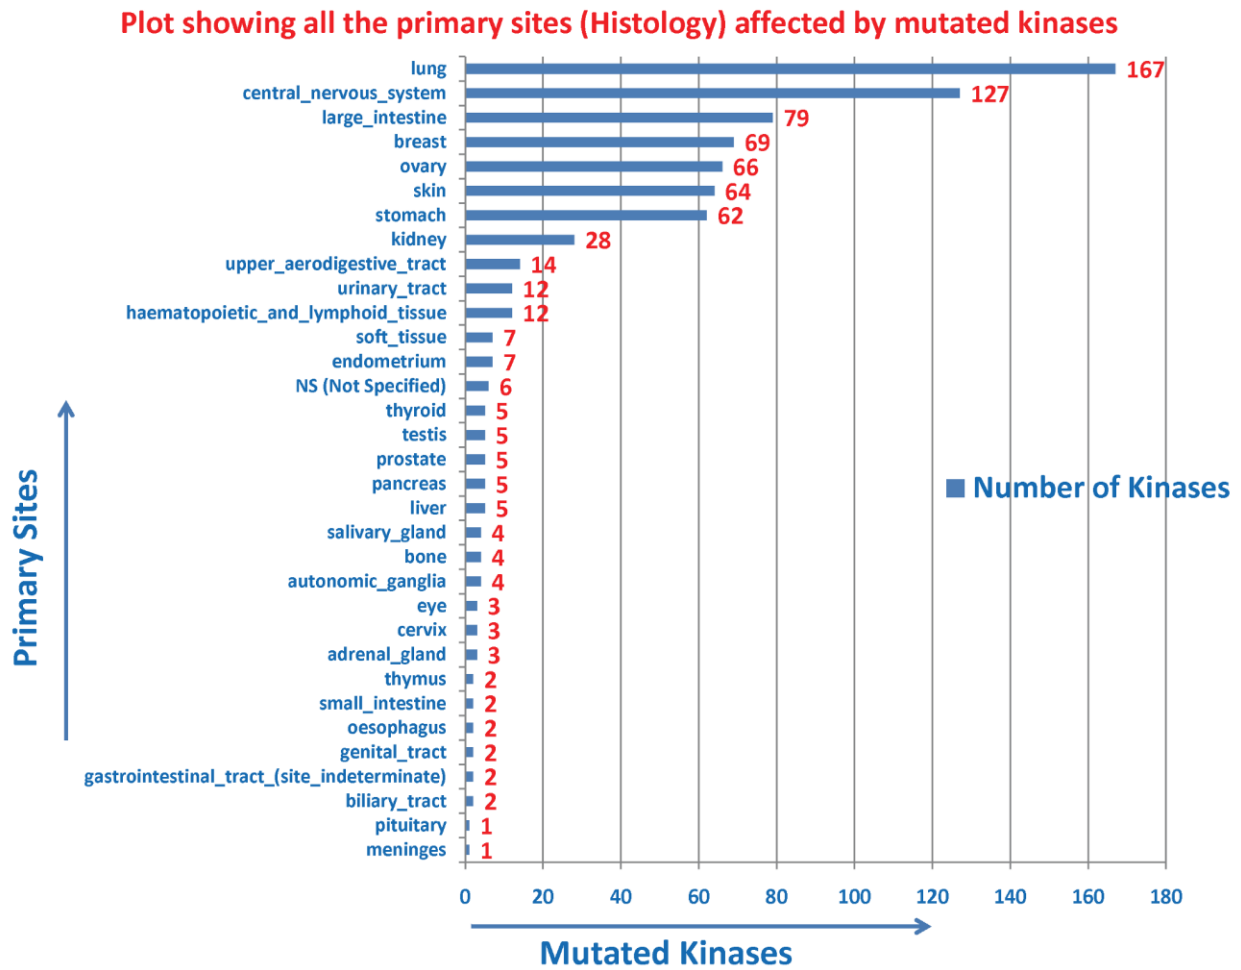

Supplement: pone.0028782.s007.pdf [file pone.0028782.s007.pdf]
