# Supplementary material for: ProKinO: An Ontology for Integrative Analysis of Protein Kinases in Cancer
Source: PubMed Central journal article supplement (PMC3237543; doi:10.1371/journal.pone.0028782), 2011-12-14
Supplement: pone.0028782.s010.pdf [file pone.0028782.s010.pdf]

## Figure S10

---

**Query 1 (Figure 2): Find the counts of crystal structures for all protein kinases and display top 10 of them in descending order of their counts.**

```
PREFIX rdf: <http://www.w3.org/1999/02/22-rdf-syntax-ns#>
PREFIX rdfs: <http://www.w3.org/2000/01/rdf-schema#>
PREFIX prokino: <http://om.cs.uga.edu/prokino/1.0/#>
SELECT (STR(?geneName) As ?Gene_Name) (COUNT(*) AS ?No_Structures) WHERE
{
  ?gene rdf:type prokino:Gene .
  ?gene prokino:hasPrimaryName ?geneName .
  ?gene prokino:hasSequence ?seq .
  ?seq prokino:hasProteinStructure ?struct
}
GROUP BY ?geneName
ORDER BY DESC(?No_Structures)
LIMIT 10
```

---

**Query 2 (Figure 3): Find the counts of isoforms for all protein kinases and display top 10 of them in descending order of their values**

```
PREFIX rdf: <http://www.w3.org/1999/02/22-rdf-syntax-ns#>
PREFIX rdfs: <http://www.w3.org/2000/01/rdf-schema#>
PREFIX prokino: <http://om.cs.uga.edu/prokino/1.0/#>
SELECT (STR(?geneName) AS ?Gene_Name) (COUNT(*) AS ?No_Sequences) WHERE
{
  ?gene rdf:type prokino:Gene .
  ?gene prokino:hasPrimaryName ?geneName .
  ?gene prokino:hasSequence ?seq .
  filter( regex( str(?seq), "Isoform" ) || regex( str(?seq), "UniProt" ) )
}
GROUP BY ?geneName
ORDER BY DESC(?No_Sequences)
LIMIT 10
```

---

**Query 3 (Figure 4) Counts of number of pathways associated with all protein kinases. Top 10 kinases with the most number of pathways are displayed in descending order.**

```
PREFIX rdf: <http://www.w3.org/1999/02/22-rdf-syntax-ns#>
PREFIX rdfs: <http://www.w3.org/2000/01/rdf-schema#>
PREFIX prokino: <http://om.cs.uga.edu/prokino/1.0/#>
SELECT (STR(?geneName) AS ?Gene_Name) (COUNT(*) AS ?No_Pathways) WHERE
```

```

{
?gene rdf:type          prokino:Gene .
?gene prokino:hasPrimaryName ?geneName .
{
SELECT ?gene ?pathway WHERE
{
?gene  rdf:type          prokino:Gene .
?gene  prokino:participatesIn ?pathway .
}
}
GROUP BY ?gene ?pathway
}
}
GROUP BY ?geneName
ORDER BY DESC(?No_Pathways)
LIMIT 10

```

---

**Query 4 (Figure 5) Find the counts of different cancer types implicated in protein kinases and display top 10 of them in descending order of their values.**

```

PREFIX  rdf: <http://www.w3.org/1999/02/22-rdf-syntax-ns#>
PREFIX  rdfs: <http://www.w3.org/2000/01/rdf-schema#>
PREFIX  prokino: <http://om.cs.uga.edu/prokino/1.0/#>
SELECT (STR(?geneName) AS ?Gene_Name) (COUNT(*) AS ?No_CancerTypes) WHERE
{
?gene rdf:type          prokino:Gene .
?gene prokino:hasPrimaryName ?geneName .
{
SELECT ?gene ?cancer WHERE
{
?gene  rdf:type          prokino:Gene .
?gene  prokino:hasMutation ?mut .
?mut   prokino:implicatedIn ?cancer
}
}
GROUP BY ?gene ?cancer
}
}
GROUP BY ?geneName
ORDER BY DESC(?No_CancerTypes)
LIMIT 10

```

---

**Query 5a (Figure 6): Find the counts of substitution missense mutations (at least 4) implicated in different types of cancer, and display them in descending order of the counts.**

```

PREFIX  rdf: <http://www.w3.org/1999/02/22-rdf-syntax-ns#>
PREFIX  rdfs: <http://www.w3.org/2000/01/rdf-schema#>
PREFIX  prokino: <http://om.cs.uga.edu/prokino/1.0/#>

```

```

SELECT (STR(?cancerName) AS ?CancerType) (COUNT(*) AS ?No_Mutations)
WHERE
{
  ?gene rdf:type          prokino:Gene .
  ?gene prokino:hasMutation    ?mut .
  ?mut  prokino:implicatedIn  ?cancer .
  ?mut  rdf:type              prokino:Missense .
  ?cancer rdfs:label          ?cancerName
}
GROUP BY ?cancerName
HAVING (count(distinct *) >= 4)
ORDER BY DESC(?No_Mutations)

```

---

**Query 5b (Figure 6): Find the counts of protein kinases having missense mutations implicated in different types of cancer, and display them in descending order of the counts.**

```

PREFIX  rdf: <http://www.w3.org/1999/02/22-rdf-syntax-ns#>
PREFIX  rdfs: <http://www.w3.org/2000/01/rdf-schema#>
PREFIX  prokino: <http://om.cs.uga.edu/prokino/1.0/#>
SELECT (str(?cancerName) AS ?CancerType) (COUNT(*) AS ?No_Genes) WHERE
{
  ?cancer rdf:type  prokino:Cancer .
  ?cancer rdfs:label ?cancerName

  {
    SELECT ?gene ?cancer WHERE
    {
      ?gene rdf:type          prokino:Gene .
      ?gene prokino:hasMutation    ?mut .
      ?mut  prokino:implicatedIn  ?cancer .
      ?mut  rdf:type              prokino:Missense .
    }
    GROUP BY ?gene ?cancer
  }
}
GROUP BY ?cancer ?cancerName
HAVING (count(distinct *) >= 2)
ORDER BY desc(?No_Genes)

```

---

**Query 6 (Figure 7): Find the counts of protein kinases having missense mutations implicated in haematopoietic neoplasm and display top 10 of them in descending order of the counts**

```
PREFIX rdf: <http://www.w3.org/1999/02/22-rdf-syntax-ns#>
PREFIX rdfs: <http://www.w3.org/2000/01/rdf-schema#>
PREFIX prokino: <http://om.cs.uga.edu/prokino/1.0/#>
```

```
SELECT (STR(?geneName) AS ?Gene_Name) (COUNT(*) AS ?No_Mutations) WHERE
{
  ?gene rdf:type          prokino:Gene .
  ?gene prokino:hasPrimaryName ?geneName .
  ?gene prokino:hasMutation  ?mut .
  ?mut prokino:implicatedIn  prokino:haematopoietic_neoplasm .
  ?mut rdf:type            prokino:Missense .
}
GROUP BY ?geneName
ORDER BY DESC(?No_Mutations)
LIMIT 10
```

---

**Query 7 (Suppl. Figure 2): Find the counts of different mutations (of all types) for all kinase genes and display the top 10 in the descending order**

```
PREFIX rdf: <http://www.w3.org/1999/02/22-rdf-syntax-ns#>
PREFIX rdfs: <http://www.w3.org/2000/01/rdf-schema#>
PREFIX prokino: <http://om.cs.uga.edu/prokino/1.0/#>
SELECT (STR(?geneName) AS ?Gene_Name) (COUNT(*) AS ?No_Mutations) WHERE
{
  ?gene rdf:type          prokino:Gene .
  ?gene prokino:hasMutation  ?mut .
  ?gene prokino:hasPrimaryName ?geneName .
}
GROUP BY ?gene ?geneName
ORDER BY DESC(?No_Mutations)
LIMIT 10
```

---

**Query 8 (Suppl. Figure 3): Find the counts of substitution missense mutations for all genes and display top 10 of them in descending order**

```
PREFIX rdf: <http://www.w3.org/1999/02/22-rdf-syntax-ns#>
PREFIX rdfs: <http://www.w3.org/2000/01/rdf-schema#>
PREFIX prokino: <http://om.cs.uga.edu/prokino/1.0/#>
SELECT (STR(?geneName) AS ?Gene_Name) (COUNT(*) AS ?No_Mutations) WHERE
{
  ?gene rdf:type          prokino:Gene .
  ?gene prokino:hasMutation  ?mut .
  ?gene prokino:hasPrimaryName ?geneName .
  ?mut rdf:type            prokino:Missense .
}

```

```
GROUP BY ?gene ?geneName
ORDER BY DESC(?No_Mutations)
LIMIT 10
```

---

**Query 9 (Suppl. Figure 4): Find the counts of protein kinases (at least 2) having mutations (of any type) implicated in different types of cancer and display them in descending order**

```
PREFIX rdf: <http://www.w3.org/1999/02/22-rdf-syntax-ns#>
PREFIX rdfs: <http://www.w3.org/2000/01/rdf-schema#>
PREFIX prokino: <http://om.cs.uga.edu/prokino/1.0/#>
SELECT (str(?cancername) AS ?Cancer_Type) (COUNT(*) AS ?No_Genes) WHERE
{
  ?cancer rdf:type prokino:Cancer .
  ?cancer rdfs:label ?cancername .
  {
    SELECT ?gene ?cancer WHERE
    {
      ?gene rdf:type prokino:Gene .
      ?gene prokino:hasMutation ?mut .
      ?mut prokino:implicatedIn ?cancer .
    }
    GROUP BY ?gene ?cancer
  }
}
GROUP BY ?cancer ?cancername
HAVING (count(distinct *) >= 2)
ORDER BY desc(?No_Genes)
```

---

**Query 10 (Suppl. Figure 5): Find the counts of protein kinases (at least 4) participating in pathways and display them in descending order; include only pathways with 4 or more participating kinases**

```
PREFIX rdf: <http://www.w3.org/1999/02/22-rdf-syntax-ns#>
PREFIX rdfs: <http://www.w3.org/2000/01/rdf-schema#>
PREFIX prokino: <http://om.cs.uga.edu/prokino/1.0/#>
SELECT (STR(?pathwayname) AS ?Pathway) (COUNT(*) AS ?No_Genes) WHERE
{
  ?pathway rdf:type prokino:Pathway .
  ?pathway prokino:hasPrimaryName ?pathwayname .
  {
    SELECT ?pathway ?mut ?gene WHERE
    {
      ?gene rdf:type prokino:Gene .
      ?gene prokino:hasMutation ?mut .
      ?gene prokino:participatesIn ?pathway .
    }
    GROUP BY ?pathway ?gene
  }
}
```

```
GROUP BY ?pathway ?pathwayname
HAVING (count(distinct *) >= 4)
ORDER BY DESC(?No_Genes)
```

---

**Query 11 (Suppl. Figure 6). Find the counts of pathways in which mutated protein kinases participate and display them in descending order; include only kinases with 4 or more pathways in which they participate**

```
PREFIX rdf: <http://www.w3.org/1999/02/22-rdf-syntax-ns#>
PREFIX rdfs: <http://www.w3.org/2000/01/rdf-schema#>
PREFIX prokino: <http://om.cs.uga.edu/prokino/1.0/#>
SELECT (STR(?geneName) AS ?Gene_Name) (COUNT(*) AS ?No_Pathways) WHERE
{
  ?gene rdf:type          prokino:Gene .
  ?gene prokino:hasPrimaryName ?geneName .
  {
    SELECT ?gene ?pathway WHERE
    {
      ?gene rdf:type          prokino:Gene .
      ?gene prokino:hasMutation ?mut .
      ?gene prokino:participatesIn ?pathway .
    }
    GROUP BY ?gene ?pathway
  }
}
GROUP BY ?geneName
HAVING (count(distinct *) >= 4)
ORDER BY DESC(?No_Pathways)
```

---

**Query 12 (Suppl. Figure 7): Find the counts of protein kinases having mutations (of any type) in various primary sites and display them in descending order**

```
PREFIX rdf: <http://www.w3.org/1999/02/22-rdf-syntax-ns#>
PREFIX rdfs: <http://www.w3.org/2000/01/rdf-schema#>
PREFIX prokino: <http://om.cs.uga.edu/prokino/1.0/#>
SELECT (STR(?primarysite) AS ?PrimarySite) (COUNT(*) AS ?No_Genes) WHERE
{
  ?gene rdf:type prokino:Gene .
  {
    SELECT ?gene ?primarysite WHERE
    {
      ?gene rdf:type          prokino:Gene .
      ?gene prokino:hasMutation ?mut .
      ?mut prokino:hasPrimarySite ?primarysite .
    }
    GROUP BY ?primarysite ?gene
  }
}
```

GROUP BY ?primarysite  
ORDER BY DESC(?No\_Genes)

---

**Query 13 (Suppl. Figure 8): Find the counts of different mutations (all types) for all sub-domains and display them in descending order**

```
PREFIX rdf: <http://www.w3.org/1999/02/22-rdf-syntax-ns#>
PREFIX rdfs: <http://www.w3.org/2000/01/rdf-schema#>
PREFIX prokino: <http://om.cs.uga.edu/prokino/1.0/#>
SELECT (STR(?subdomainName) AS ?Subdomain_Name) (COUNT(*) AS ?No_Mutations) WHERE
{
  ?gene rdf:type prokino:Gene .
  ?gene prokino:hasMutation ?mutation .
  ?mutation prokino:locatedIn ?subdomain .
  ?subdomain rdf:type ?subdomainType .
  ?subdomainType rdfs:label ?subdomainName
}
GROUP BY ?subdomainType ?subdomainName
ORDER BY DESC(?No_Mutations)
```

---

**Query 14 (Suppl. Figure 9): Find the counts of substitution missense mutations of the protein kinase FLT3 all having the primary site of Haematopoietic and Lymphoid tissue, and located in various sub-domains and display them in descending order.**

```
PREFIX rdf: <http://www.w3.org/1999/02/22-rdf-syntax-ns#>
PREFIX rdfs: <http://www.w3.org/2000/01/rdf-schema#>
PREFIX prokino: <http://om.cs.uga.edu/prokino/1.0/#>
PREFIX afn: <http://jena.hpl.hp.com/ARQ/function#>
SELECT (STR(?subdomainName) AS ?Subdomain_Name)
       ?Between_Subdomains_Details
       (COUNT(*) AS ?No_Mutations) WHERE
{
  prokino:FLT3 prokino:hasMutation ?mutation .
  ?mutation prokino:locatedIn ?subdomain .
  ?mutation prokino:hasPrimarySite "haematopoietic_and_lymphoid_tissue" .
  ?mutation rdf:type prokino:Missense .
  ?subdomain rdf:type ?subdomainType .
  ?subdomainType rdfs:label ?subdomainName
  OPTIONAL {
    ?subdomain rdf:type prokino:BetweenSubDomains .
    ?subdomain rdfs:label ?betweenType
    BIND( afn:substring(STR(?betweenType), 22) AS ?Between_Subdomains_Details )
  }
}
GROUP BY ?subdomainType ?subdomainName ?Between_Subdomains_Details
ORDER BY DESC(?No_Mutations)
```

---
